# Supplementary material for: ZIF-8-derived carbon-modified g-C3N4 heterostructure with enhanced photocatalytic activity for dye degradation and hydrogen production
Source: Royal Society of Chemistry journal article supplement (doi:10.1039/d1dt03385a), 2021-01-01
Supplement: d1dt03385a1.pdf [file d1dt03385a1.pdf]

# **ZIF-8-derived carbon modified g-C<sub>3</sub>N<sub>4</sub> heterostructure with enhanced photocatalytic activity for dye degradation and hydrogen production**

Xin Chang<sup>1</sup>, Ye Wang<sup>1</sup>, Xuejiao Zhang<sup>\*,1</sup>, Yi Song<sup>3</sup> and Mingyi Zhang<sup>\*,1,2</sup>

*1 Key Laboratory for Photonic and Electronic Bandgap Materials, Ministry of Education, School of Physics and Electronic Engineering, Harbin Normal University, Harbin 150025, People's Republic of China.*

*2 School of Materials Science and Engineering, Zhengzhou University, Zhengzhou, 45001, PR China*

*3 Institute of Data Science and Artificial Intelligence, Harbin Huade University, Harbin 150025, PR China*

\*Corresponding author:

Key Laboratory for Photonic and Electronic Bandgap Materials, Ministry of Education, School of Physics and Electronic Engineering, Harbin Normal University, Harbin 150025, P. R. China.

E-mail: [zhangmingyi@hrbnu.edu.cn](mailto:zhangmingyi@hrbnu.edu.cn) (M.Y. Zhang)

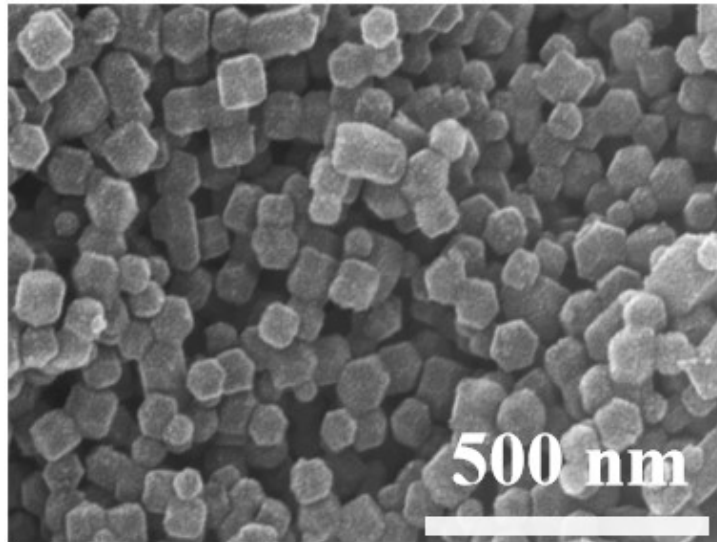

Fig. S1. SEM image of the sample obtained by heating the ZIF-8 at 900 °C under Ar gas flow.

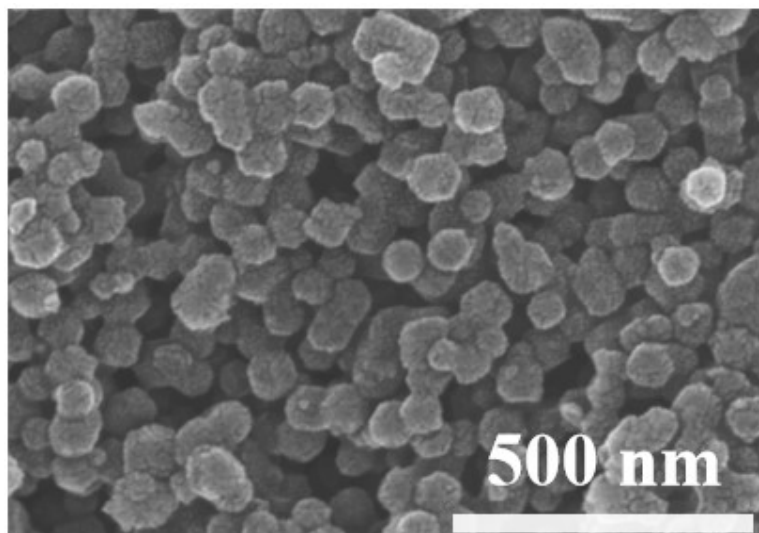

Fig. S2. SEM image of C-ZIF.

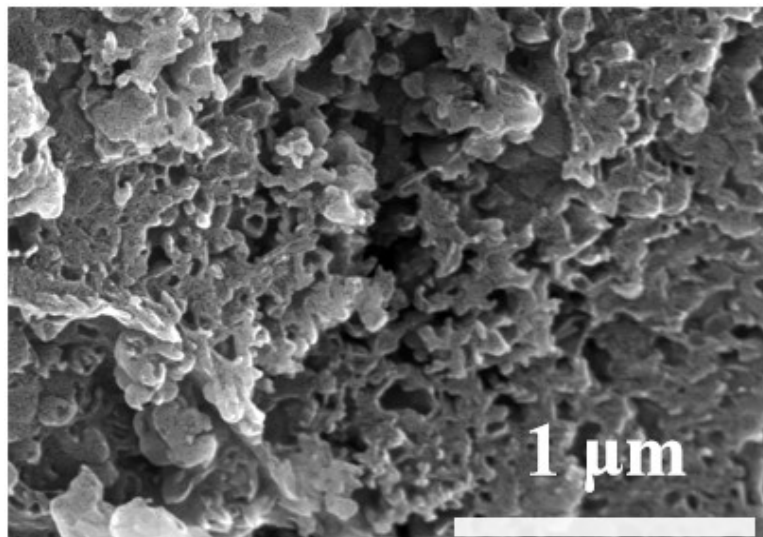

Fig. S3. SEM image of 10-C-ZIF+g-C<sub>3</sub>N<sub>4</sub>.

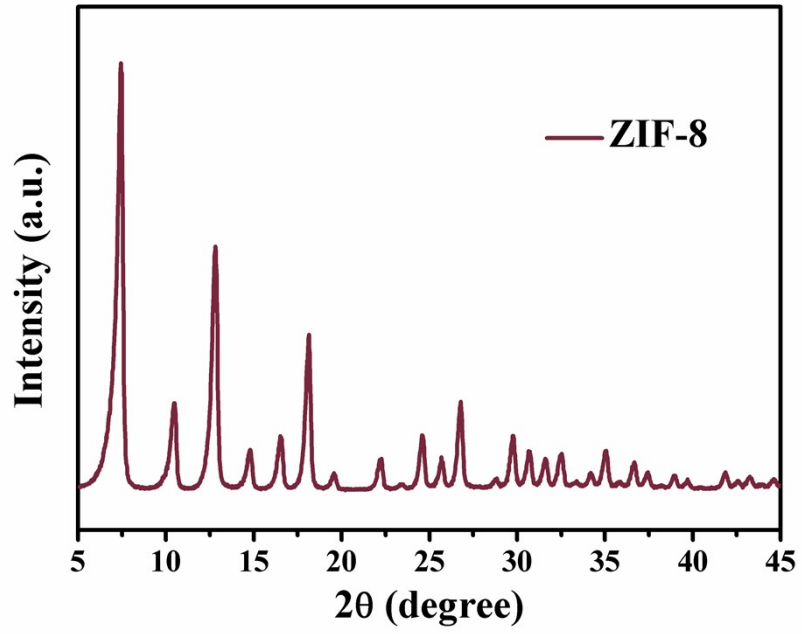

Fig. S4. XRD pattern of as-synthesized ZIF-8

**Table S1.** TG, EDX data and BET surface areas of g-C<sub>3</sub>N<sub>4</sub>, 10-C-ZIF+g-C<sub>3</sub>N<sub>4</sub> and C-ZIF@g-C<sub>3</sub>N<sub>4</sub> composites with different C-ZIF contents.

| Samples                                  | C-ZIF Contents<br>(Wt.%) <sup>a</sup> | Element Contents         |       | BET S.A.<br>( m <sup>2</sup> .g <sup>-1</sup> ) <sup>c</sup> |
|------------------------------------------|---------------------------------------|--------------------------|-------|--------------------------------------------------------------|
|                                          |                                       | C<br>(At.%) <sup>b</sup> | N     |                                                              |
| g-C <sub>3</sub> N <sub>4</sub>          | --                                    | 42.25                    | 57.75 | 15.916                                                       |
| 5-C-ZIF@g-C <sub>3</sub> N <sub>4</sub>  | 5.9                                   | 47.91                    | 52.09 | 13.982                                                       |
| 10-C-ZIF@g-C <sub>3</sub> N <sub>4</sub> | 9.7                                   | 49.72                    | 50.28 | 15.735                                                       |
| 10-C-ZIF+g-C <sub>3</sub> N <sub>4</sub> | 9.7                                   | 50.66                    | 49.34 | 10.181                                                       |
| 20-C-ZIF@g-C <sub>3</sub> N <sub>4</sub> | 15.7                                  | 53.62                    | 46.28 | 13.441                                                       |
| 30-C-ZIF@g-C <sub>3</sub> N <sub>4</sub> | 22.7                                  | 60.53                    | 39.47 | 15.803                                                       |
| C-ZIF                                    | --                                    | 84.70                    | 15.30 | 983.723                                                      |

[a] The value was determined by EDX.

[b] The contents of C-ZIF in the final prepared samples were obtained by TG.

[c] The specific surface area of samples was confirmed by BET.
